# Supplementary material for: Lactic acid bacteria strains relieve hyperuricaemia by suppressing xanthine oxidase activityviaa short-chain fatty acid-dependent mechanism
Source: Royal Society of Chemistry journal article supplement (doi:10.1039/d1fo00198a), 2021-01-01
Supplement: d1fo00198a1.pdf [file d1fo00198a1.pdf]

Table S1 The abilities of LAB strains to degrade hypoxanthine

| LAB strains | Hypoxanthine degradation rate (%) |
|-------------|-----------------------------------|
| R15         | 1.85±4.14 <sup>ab</sup>           |
| R42         | 0.81±1.31 <sup>ab</sup>           |
| R31         | -5.27±10.23 <sup>a</sup>          |
| R28-1       | 2.71±2.34 <sup>b</sup>            |
| R12         | 0.46±1.07 <sup>ab</sup>           |
| L20M3       | 3.76±1.49 <sup>b</sup>            |
| L12L1       | 0.85±3.03 <sup>ab</sup>           |
| L3L1        | 5.35±3.17 <sup>b</sup>            |
| 138-1       | 5.15±3.52 <sup>b</sup>            |
| L33L6       | 1.55±0.63 <sup>ab</sup>           |

Different letters indicated significant differences between the groups ( $p < 0.05$ ).

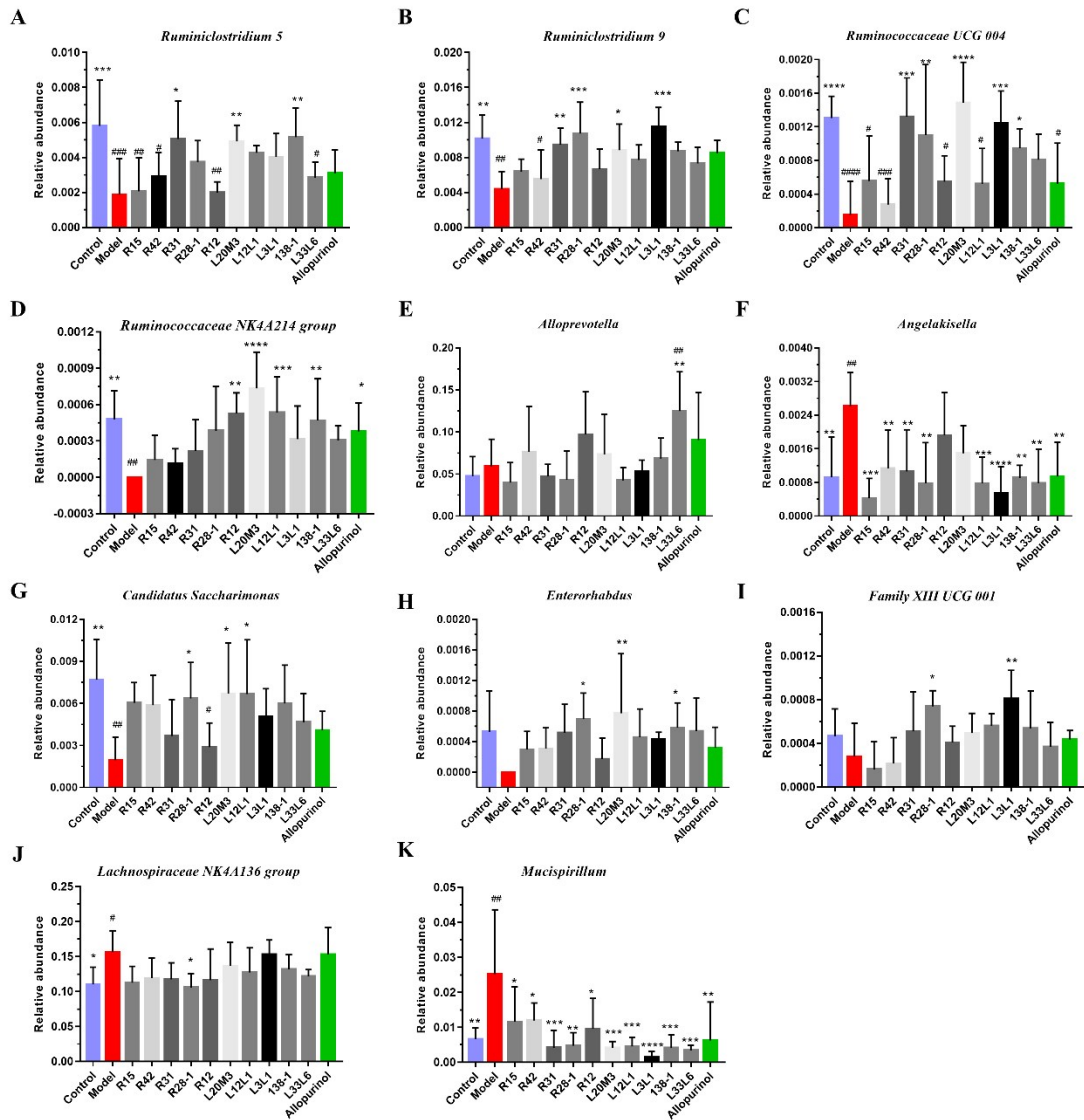

Figure S1 The relative abundance of 11 genera selected by LefSe. (A) *Ruminiclostridium 5*; (B) *Ruminiclostridium 9*; (C) *Ruminococcaceae UCG 004*; (D) *Ruminococcaceae NK4A214 group*; (E) *Alloprevotella*; (F) *Angelakisella*; (G) *Candidatus Saccharimonas*; (H) *Enterorhabdus*; (I) *Family XIII UCG 001*; (J) *Lachnospiraceae NK4A136 group*; (K) *Mucispirillum*.

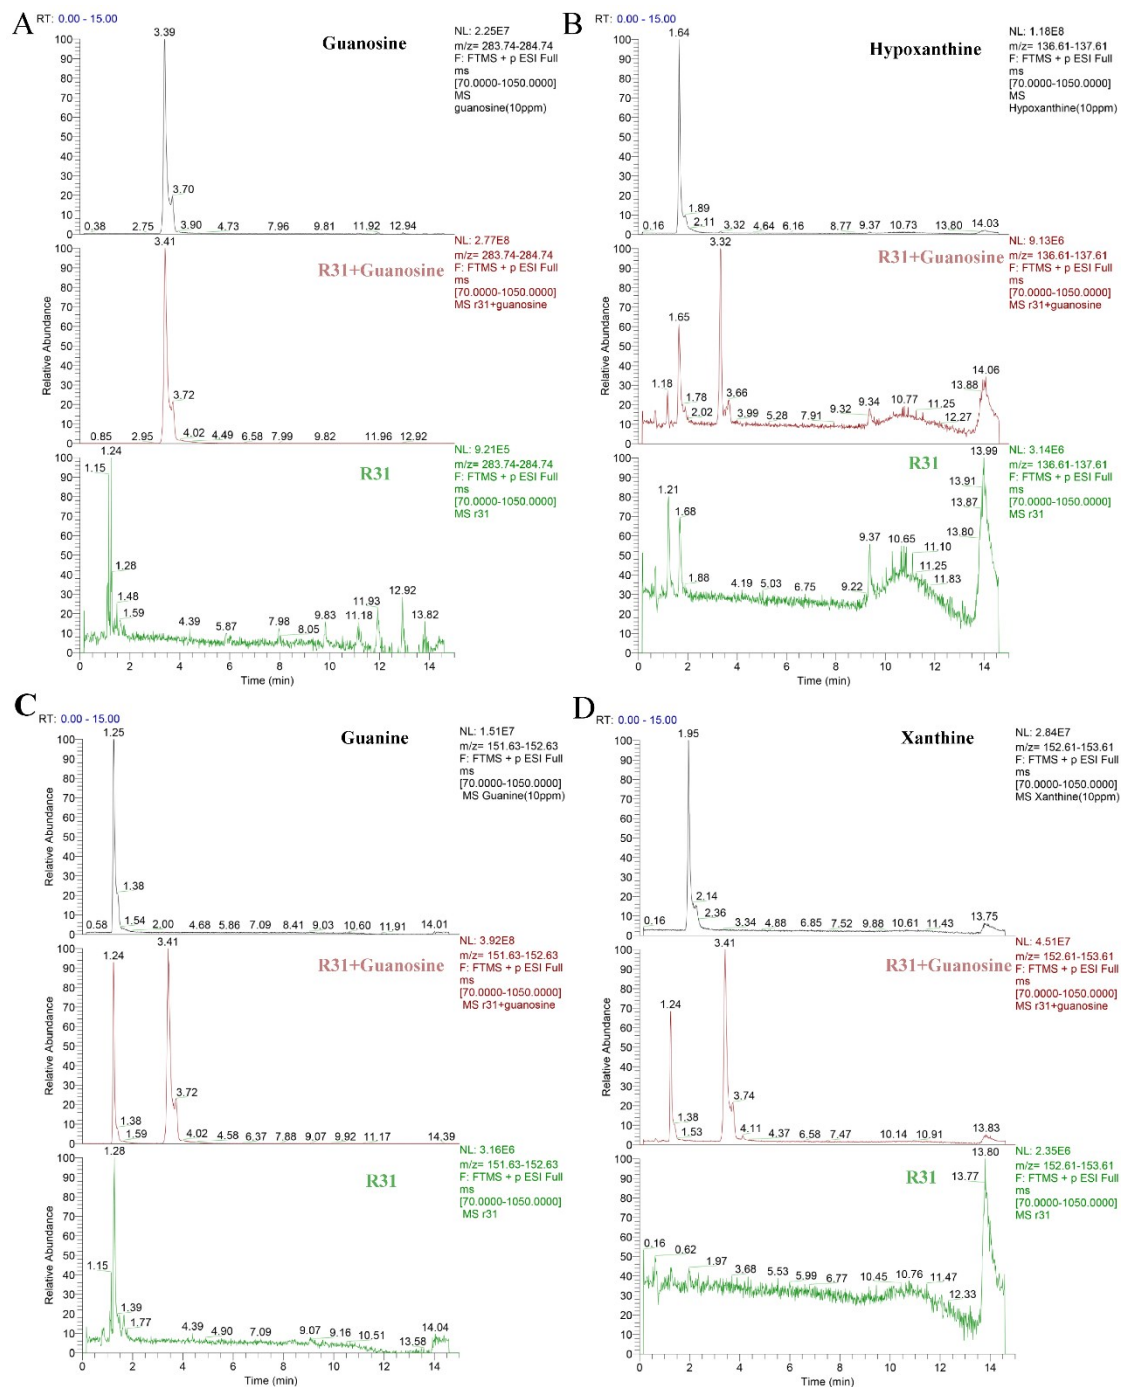

Figure S2 The main products of guanosine degradation by *L. rhamnosus* R31. (A) Guanosine (m/z= 283.74-284.74); (B) Hypoxanthine (m/z= 136.61-137.61); (C) Guanine (m/z= 151.63-152.63); (D) Xanthine (m/z =152.61-153.61)
